# Supplementary material for: Hierarchical photonic structured stimuli-responsive materials as high-performance colorimetric sensors
Source: Royal Society of Chemistry journal article supplement (doi:10.1039/c6nr01875k), 2016-01-01
Supplement: c6nr01875k1.pdf [file c6nr01875k1.pdf]

## Supporting Information

### **Hierarchically photonic structured stimuli-responsive materials as high-performance colorimetric sensors**

*Tao Lu<sup>†</sup>, Shenmin Zhu,<sup>\*\*†</sup> Zhixin Chen,<sup>‡</sup> Wanlin Wang,<sup>†</sup> Wang Zhang<sup>†</sup> and Di Zhang<sup>\*\*†</sup>*

<sup>†</sup>State Key Laboratory of Metal Matrix Composites, Shanghai Jiao Tong University,  
800 Dongchuan Road, Shanghai 200240, China

<sup>‡</sup>School of Mechanical, Materials & Mechatronics Engineering, University of  
Wollongong, Wollongong, NSW2522, Australia

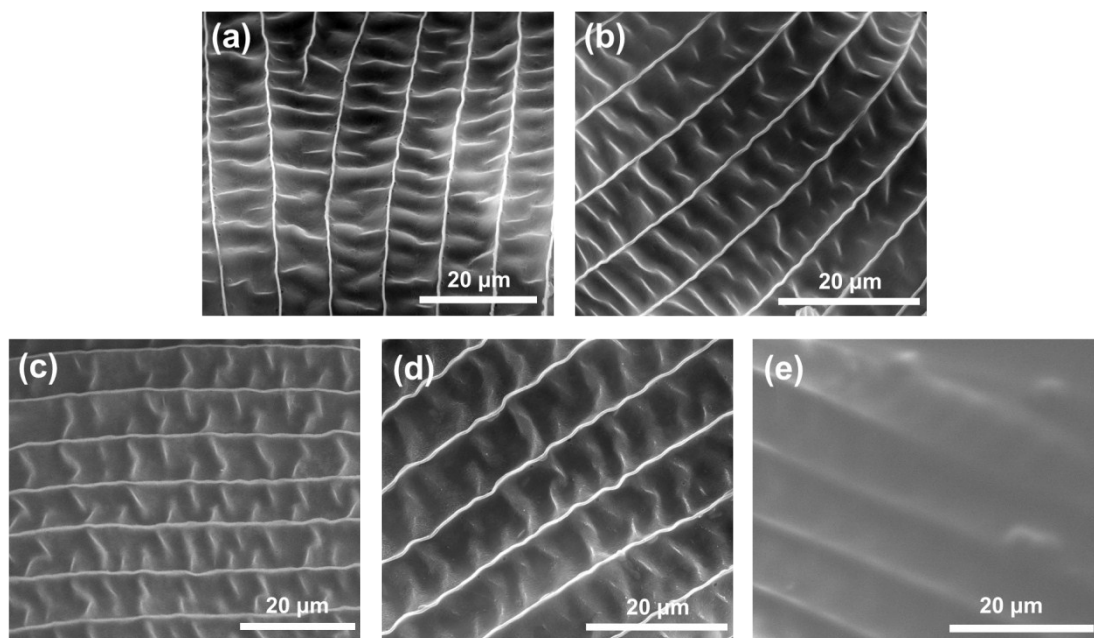

Figure S1. Low magnification SEM images of (a) original *Papilio* butterfly wings, (b) alkali-treated biotemplate and (c-e) PAAM-*Papilio*-1, -2 and -3.

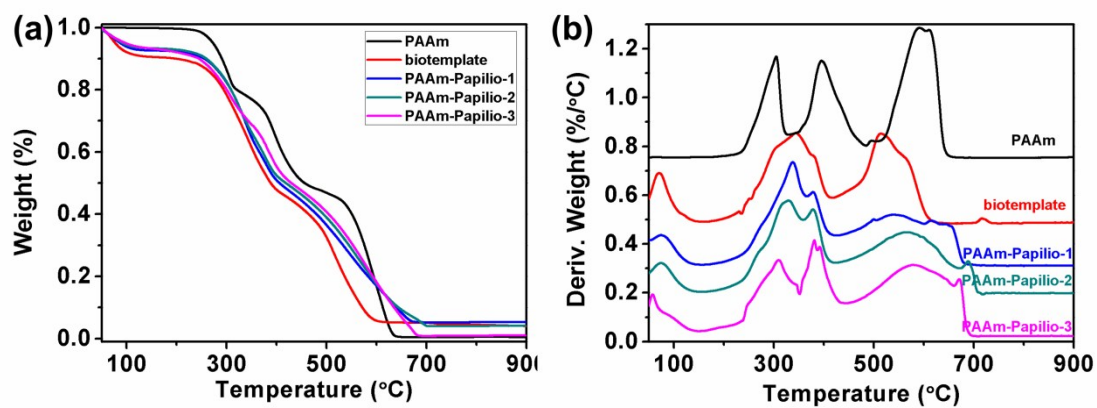

Figure S2. TGA (a) and DTGA (b) curves of pure PAAm, alkali-treated biotemplate and three samples with different polymer content.
